# Supplementary material
Source: publisher site journal article supplement (https://www.dovepress.com/article/447426)
Supplement: Supplementary file 1 [file get_supplementary_file.php]

**Supplementary Table 1** The standardized coefficients for the moderated mediation model established using the mean of the six generalization stimuli. In the non-instruction group, the indirect effects were not found to be significant. In the instruction group, the indirect effects were significant.

|  | | *β* | *SE* | *p* | 95%CI | | Effect size |
| --- | --- | --- | --- | --- | --- | --- | --- |
| lower | upper |
| Total effect | Non-instruction | 0.603 | 0.067 | <0.001 | 0.448 | 0.712 |  |
| Instruction | 0.566 | 0.076 | <0.001 | 0.429 | 0.709 |  |
| Indirect effect | Non-instruction | 0.019 | 0.019 | 0.316 | -0.005 | 0.073 | 3.15% |
| Instruction | 0.117 | 0.042 | 0.006 | 0.046 | 0.217 | 20.67% |
| Direct effect | Non-instruction | 0.584 | 0.069 | <0.001 | 0.430 | 0.702 | 96.85% |
| Instruction | 0.449 | 0.083 | <0.001 | 0.296 | 0.612 | 79.33% |

**Supplementary Table 2** Total, direct, and IU-mediated indirect coefficients of the generalization stimuli (GS and new generalization stimuli, NGS) ranging from 1 to 6 on the pre-reversal generalization to reversal generalization.

|  | | | *β* | *SE* | *p* | 95%CI | | |
| --- | --- | --- | --- | --- | --- | --- | --- | --- |
| lower | upper | |
| GS1/  NGS1 | Total effect | Non-instruction | 0.556 | 0.070 | <0.001 | 0.387 | 0.670 | |
| Instruction | 0.423 | 0.106 | <0.001 | 0.241 | 0.633 | |
| Total indirect | Non-instruction | -0.019 | 0.024 | 0.441 | -0.082 | 0.019 | |
| Instruction | 0.113 | 0.046 | 0.015 | 0.042 | 0.239 | |
| Direct effect | Non-instruction | 0.574 | 0.075 | <0.001 | 0.391 | 0.696 | |
| Instruction | 0.310 | 0.121 | 0.011 | 0.092 | 0.560 | |
| GS2/  NGS2 | Total effect | Non-instruction | 0.461 | 0.095 | <0.001 | 0.236 | 0.613 | |
| Instruction | 0.403 | 0.092 | <0.001 | 0.261 | | 0.596 |
| Total indirect | Non-instruction | 0.015 | 0.020 | 0.458 | -0.013 | 0.072 | |
| Instruction | 0.099 | 0.042 | 0.018 | 0.032 | 0.199 | |
| Direct effect | Non-instruction | 0.447 | 0.093 | <0.001 | 0.234 | 0.605 | |
| Instruction | 0.303 | 0.093 | 0.001 | 0.151 | 0.514 | |
| GS3/  NGS3 | Total effect | Non-instruction | 0.343 | 0.114 | 0.003 | 0.099 | 0.542 | |
| Instruction | 0.506 | 0.080 | <0.001 | 0.357 | 0.660 | |
| Total indirect | Non-instruction | 0.009 | 0.022 | 0.671 | -0.030 | 0.063 | |
| Instruction | 0.105 | 0.047 | 0.026 | 0.032 | 0.234 | |
| Direct effect | Non-instruction | 0.334 | 0.109 | 0.002 | 0.104 | 0.530 | |
| Instruction | 0.400 | 0.097 | <0.001 | 0.213 | 0.589 | |
| GS4/  NGS4 | Total effect | Non-instruction | 0.467 | 0.090 | <0.001 | 0.262 | 0.621 | |
| Instruction | 0.421 | 0.098 | <0.001 | 0.261 | 0.623 | |
| Total indirect | Non-instruction | 0.009 | 0.022 | 0.690 | -0.021 | 0.075 | |
| Instruction | 0.109 | 0.046 | 0.018 | 0.039 | 0.232 | |
| Direct effect | Non-instruction | 0.458 | 0.094 | <0.001 | 0.247 | 0.619 | |
| Instruction | 0.312 | 0.100 | 0.002 | 0.138 | 0.522 | |
| GS5/  NGS5 | Total effect | Non-instruction | 0.552 | 0.075 | <0.001 | 0.379 | 0.674 | |
| Instruction | 0.391 | 0.111 | <0.001 | 0.195 | 0.613 | |
| Total indirect | Non-instruction | 0.028 | 0.022 | 0.201 | -0.002 | 0.089 | |
| Instruction | 0.067 | 0.045 | 0.136 | -0.004 | 0.181 | |
| Direct effect | Non-instruction | 0.524 | 0.074 | <0.001 | 0.358 | 0.649 | |
| Instruction | 0.323 | 0.105 | 0.002 | 0.134 | 0.547 | |
| GS6/  NGS6 | Total effect | Non-instruction | 0.512 | 0.086 | <0.001 | 0.311 | 0.654 | |
| Instruction | 0.295 | 0.112 | 0.008 | 0.100 | 0.533 | |
| Total indirect | Non-instruction | 0.005 | 0.028 | 0.872 | -0.057 | 0.059 | |
| Instruction | 0.058 | 0.035 | 0.100 | 0.010 | 0.170 | |
| Direct effect | Non-instruction | 0.508 | 0.079 | <0.001 | 0.323 | 0.637 | |
| Instruction | 0.237 | 0.118 | 0.045 | 0.032 | 0.0491 | |
